# Supplementary material for: Production of Fucoxanthin from Phaeodactylum tricornutum Using High Performance Countercurrent Chromatography Retaining Its FOXO3 Nuclear Translocation-Inducing Effect
Source: MDPI journal article supplement (doi:10.3390/md19090517), 2021-09-11

**Figure S1.** Growth curve of *Phaeodactylum tricornutum* P5-CCAP in 80 L tubular photobioreactor. The culture growth was monitored by V-1200 spectrophotometer as optical density at near infrared wavelength 750 nm with optical path length 5 mm.

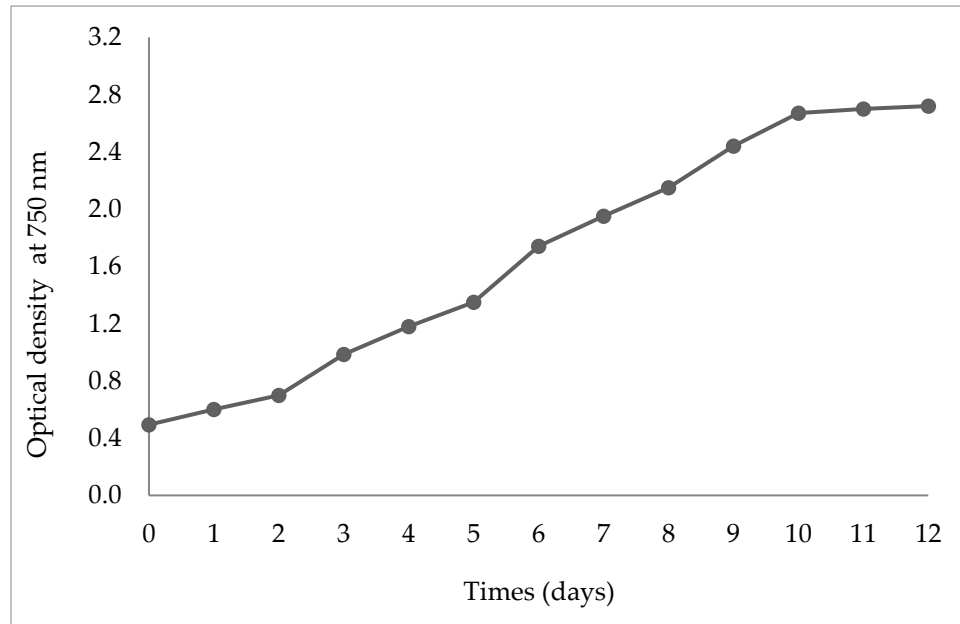

Supplement: s1 [file s1]
